# Supplementary material
Source: publisher figshare collection journal article supplement (https://acs.figshare.com/ndownloader/files/22017342)

## SUPPORTING INFORMATION

# Discovery of Novel Allosteric Inhibitors of Deoxyhypusine Synthase

*Yuta Tanaka,<sup>\*,†</sup> Osamu Kurasawa,<sup>†</sup> Akihiro Yokota,<sup>†</sup> Michael G. Klein,<sup>‡</sup> Koji Ono,<sup>†</sup>*

*Bunnai Saito,<sup>†</sup> Shigemitsu Matsumoto,<sup>†</sup> Masanori Okaniwa,<sup>†</sup> Geza Ambrus-Aikelin,<sup>‡</sup>*

*Daisuke Morishita,<sup>†</sup> Satoshi Kitazawa,<sup>†</sup> Noriko Uchiyama,<sup>†</sup> Kazumasa Ogawa,<sup>†</sup>*

*Hiromichi Kimura,<sup>†</sup> and Shinichi Imamura<sup>†</sup>*

<sup>†</sup>Pharmaceutical Research Division, Takeda Pharmaceutical Company Limited: 26-1,

Muraoka-Higashi 2-chome, Fujisawa, Kanagawa 251-8555, Japan

<sup>‡</sup>Department of Structural Biology, Takeda California, 10410 Science Center Drive, San

Diego, California 92121, United States

\* For Y. T.: phone: +81-466-32-1164. E-mail: yuta.tanaka@takeda.com

## TABLE OF CONTENTS

|                                                                    |    |
|--------------------------------------------------------------------|----|
| Table S1: Data collection and refinement statistics .....          | S2 |
| Figure S1: Closeup view highlighting the orientation of GC-7 ..... | S3 |
| Figure S2: Omit electron density Fo-Fc map of GC-7 .....           | S4 |
| Figure S3: Omit electron density Fo-Fc map of <b>11g</b> .....     | S5 |

**Table S1.** Data collection and refinement statistics

| <u><i>X-Ray Structure</i></u>              | DHS-NAD-GC7 / PDB: 6P4V        | DHS-11g / PDB: 6PGR            |
|--------------------------------------------|--------------------------------|--------------------------------|
| <u><i>Data collection</i></u>              |                                |                                |
| Resolution range (Å)                       | 50-1.65 (1.68-1.65)            | 50-1.95(1.98-1.95)             |
| Space group                                | P3 <sub>2</sub> 2 <sub>1</sub> | P3 <sub>2</sub> 2 <sub>1</sub> |
| Cell dimensions:                           |                                |                                |
| <i>a</i> , <i>b</i> , <i>c</i> (Å)         | 104.5, 104.5, 159.5            | 104.6, 104.6, 160.5            |
| α, β, γ (°)                                | 90.0, 90.0, 120.0              | 90.0, 90.0, 120.0              |
| R <sub>sym</sub>                           | 10.1 (94.2)                    | 9.1(91.9)                      |
| <I / σI>                                   | 12.0 (1.9)                     | 20.3(2.6)                      |
| Completeness (%)                           | 99.9 (100)                     | 100(100)                       |
| Redundancy                                 | 5.6 (5.6)                      | 7.3 (7.3)                      |
| <u><i>Structure Refinement</i></u>         |                                |                                |
| Resolution (Å)                             | 43.7-1.65                      | 49.8-1.95                      |
| No. reflections                            | 113,578                        | 70,577                         |
| No. reflections R <sub>free</sub> test set | 6,006                          | 3,744                          |
| R <sub>work</sub> / R <sub>free</sub>      | 16.1/17.4                      | 16.8 /19.4                     |
| No. atoms:                                 |                                |                                |
| Protein                                    | 5,172                          | 5,421                          |
| NAD                                        | 88                             | -                              |
| Inhibitor                                  | 24                             | 44                             |
| MPD                                        | 8                              | -                              |
| Waters                                     | 328                            | 359                            |
| Mean B Value (Å <sup>2</sup> ):            |                                |                                |
| Protein B Value                            | 29.0                           | 31.5                           |
| NAD B Value                                | 21.2                           | -                              |
| Inhibitor B Value                          | 18.0                           | 27.7                           |
| MPD B Value                                | 36.3                           | -                              |
| Water B Value                              | 34.5                           | 35.6                           |
| RMS Bond lengths (Å)                       | 0.007                          | 0.008                          |
| RMS Bond angles (°)                        | 1.317                          | 1.28                           |
| Ramachandran statistics:                   |                                |                                |
| Favored (%)                                | 98.3                           | 98.5                           |
| Outliers (%)                               | 0                              | 0                              |

\*Values in parentheses are for highest-resolution shell.

**Figure S1.** Closeup view highlighting the orientation of GC-7 (PDB IDs 6P4V and 1RQD). The 1.65 Å ternary complex of DHPS (yellow) is superposed with the previously published 3 Å structure containing the same ligands (cyan). For clarity, NAD and a part of protein are omitted. Presumably the well featured electron density map generated from our high resolution diffraction data allowed for a more accurate docking of **1**, this led to a disagreement between the final models where **1** appears rotated  $\sim 180^\circ$  about its own short axis.

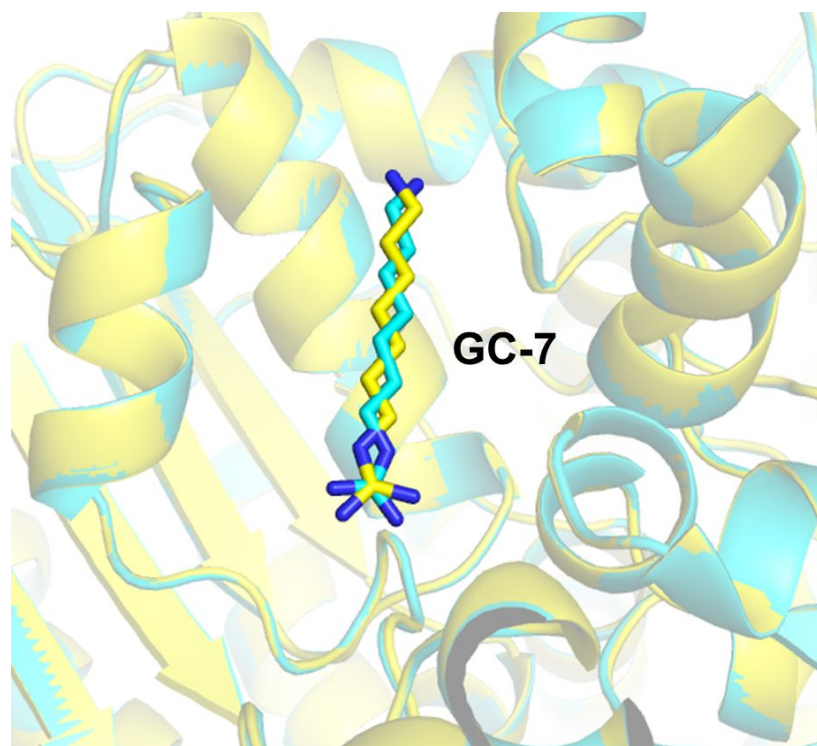

**Figure S2.** Omit electron density Fo-Fc map (rendered as mesh) corresponding to GC7 (displayed as green sticks). Map is contoured at  $\pm 3.0 \sigma$ . Figure was created using Pymol.

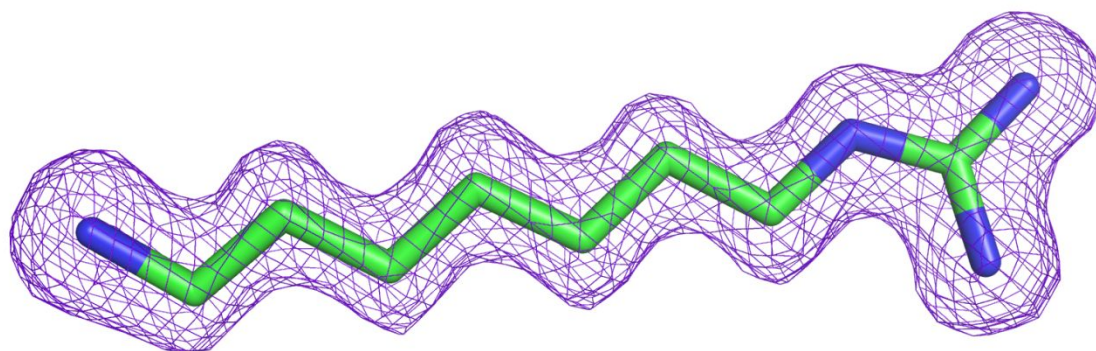

**Figure S3.** Omit electron density Fo-Fc map (rendered as mesh) corresponding to the compound **11g** (displayed as green sticks). Map is contoured at  $\pm 3.0 \sigma$ . Figure was created using Pymol.

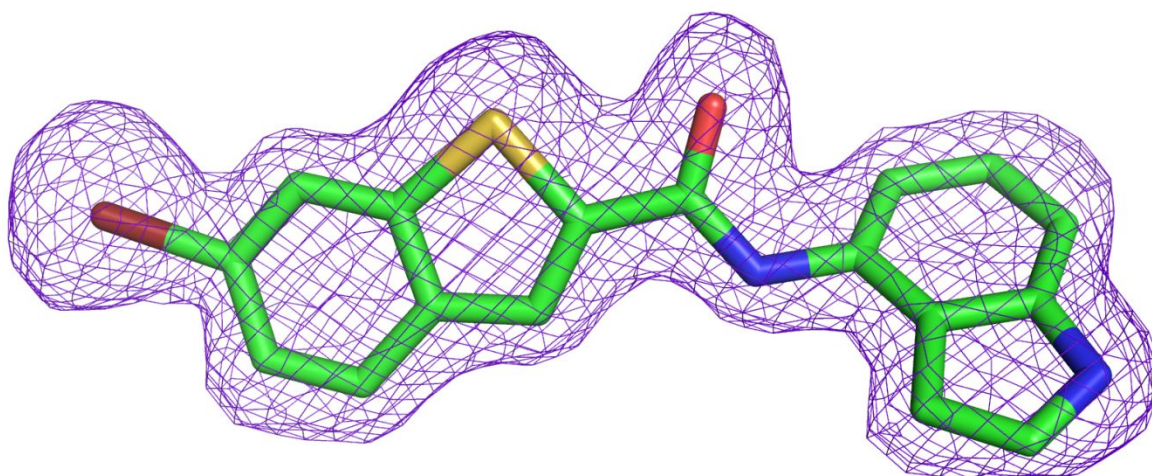

Supplement: Supplementary file 1 [file 22017342]
